# Supplementary material for: Reward Responsiveness, Optimism, and Social and Mental Functioning in Children Aged 6-7: Protocol of a Cross-Sectional Pilot Study
Source: PubMed Central journal article supplement (PMC7545321; doi:10.2196/18902), 2020-09-24
Supplement: resprot_v9i9e18902_app1.pdf [file resprot_v9i9e18902_app1.pdf]

## Reward Responsiveness, Optimism, and Social and Mental Functioning in Children Aged 6-7: Protocol of a Cross-Sectional Pilot Study

Charlotte Vrijen\*, Mégane Alice Ackermans¶, Anna Bosma¶ & Tina Kretschmer

\* Corresponding author: c.vrijen@rug.nl

¶ Both co-authors contributed equally to this paper

### *Multimedia Appendix 1. All child questionnaire items used in the present study, including the Dutch translations and original formulations.*

Table S1

#### *Child Questionnaires and Translations*

| No.                                      | Original item                                                                                                                                               | Dutch adapted item                                                                                      | Translation adapted item                                                   | Response options                            |
|------------------------------------------|-------------------------------------------------------------------------------------------------------------------------------------------------------------|---------------------------------------------------------------------------------------------------------|----------------------------------------------------------------------------|---------------------------------------------|
| <b>The pleasure scale (based on [1])</b> |                                                                                                                                                             |                                                                                                         |                                                                            |                                             |
| 1                                        | Someone that you like very much calls you and asks you to come and play with him/her.                                                                       | Iemand die je heel aardig vindt vraagt of je mee gaat spelen.                                           | Someone that you like very much asks you to play with him/her.             | (How do you feel when this happens to you?) |
| 2                                        | a. You sit eating your favorite meal, which someone has cooked for you.<br>b. You come home from school and smell your favorite cookies baking in the oven. | Je komt thuis en je hoort dat jullie je lievelingseten gaan eten.                                       | You come home and hear you are going to eat your favorite meal.            | very happy – happy – does not really matter |
| 3                                        | Your teacher makes you “King/Queen for a day” because you are such a great student.                                                                         | Je juf/meester zegt aan het eind van de dag dat je het heel goed gedaan hebt vandaag.                   | At the end of the day, your teacher says that you did very well today.     |                                             |
| 4                                        | Someone buys you the new toy you’ve been asking for since last year.                                                                                        | Je krijgt op je verjaardag het speelgoed dat je al heel lang wilt hebben.                               | For your birthday you get the gift you’ve wanted for a long time.          |                                             |
| 5                                        | While playing your favorite video game, you beat the high score listed on the game board.                                                                   | Je speelt je lievelingscomputerspel en haalt de hoogste score.                                          | You are playing your favorite computer game and get the highest score.     |                                             |
| 6                                        | You are at a party with all your friends, good music and lots of good food.                                                                                 | Je gaat naar het verjaardagsfeestje van een goed vriendje en al je vriendjes en vriendinnetjes zijn er. | You go to a good friend’s party and all your friends are there.            |                                             |
| 7                                        | Your mother tells you how neatly you keep your room.                                                                                                        | Je papa of mama zegt dat je heel goed zelf je speelgoed hebt opgeruimd.                                 | Your parents tell you that you cleaned up your toys very well by yourself. |                                             |
| 8                                        | Your friend tells you that “you are the best friend he/she ever had.”                                                                                       | Je vriendje/vriendinnetje zegt tegen je dat je zijn/haar allerbeste vriend(in) bent.                    | Your friend tells you that you are his/her best friend.                    |                                             |

| <b>Optimism/pessimism</b> (based on [2,3]) |                                                                            |                                                                                     |                                                                                         |                                    |
|--------------------------------------------|----------------------------------------------------------------------------|-------------------------------------------------------------------------------------|-----------------------------------------------------------------------------------------|------------------------------------|
| 1                                          | When I am not sure what will happen next, I usually think it will be good. | Als ik niet weet wat we gaan doen in de klas, denk ik dat het iets leuks is.        | When I am not sure what will happen next at school, I usually think it will be good.    | (How often do you think this?)     |
| 2                                          | When things are good, I think something will go wrong.                     | Als ik leuk aan het spelen ben, dan denk ik vaak dat er iets fout gaat.             | When I am having fun playing, I think something will go wrong.                          | never – sometimes – often – always |
| 3                                          | I usually think I will have a good day                                     | Als ik 's ochtends wakker wordt dan denk ik meestal dat het een leuke dag wordt.    | When I wake up, I usually think today will be a good day.                               |                                    |
| 4                                          | Overall, I think more good things will happen to me than bad things.       | Er gebeuren vaker leuke dingen bij mij dan vervelende dingen.                       | Overall, more good things happen to me than bad things.                                 |                                    |
| 5                                          | Each day I think bad things will happen.                                   | Ik denk vaak dat er morgen iets vervelends gaat gebeuren.                           | I often think bad things will happen tomorrow.                                          |                                    |
| 6                                          | When things are bad, I think they will get better.                         | Als iets niet goed gaat denk ik dat het straks beter gaat.                          | When things go wrong, I think they will get better.                                     |                                    |
| <b>Social Experiences</b>                  |                                                                            |                                                                                     |                                                                                         |                                    |
| 1                                          |                                                                            | Met welke kinderen uit je klas vind je het leuk om te spelen?                       | Which classmates do you like to play with?                                              | choose from all classmates         |
| 2                                          |                                                                            | Met welke kinderen uit je klas speel je liever niet?                                | Which classmates do you not like to play with?                                          |                                    |
| 3                                          |                                                                            | Zijn er kinderen in de klas die andere kinderen uitschelden of slaan? Wie zijn dat? | Are there classmates who call other children names or hit other children? Who are they? |                                    |
| 4                                          |                                                                            | Zijn er kinderen in de klas die worden uitgescholden of geslagen? Wie zijn dat?     | Are there classmates who are called names or hit by other children? Who are they?       |                                    |

*Note.* The following items were part of a pilot with five parents and their children, but were excluded from the pleasure scale afterwards because we wanted to reduce the number of items: ‘You win the first prize in a contest at school’ (reason: overlap with current item 5) and ‘Your parents tuck you in and give you a kiss good night’ (reason: we wanted to exclude one more item and thought that the other items better represented the different domains). The following items were excluded from the optimism/pessimism questionnaire after the pilot: ‘Usually I don’t think good things will happen to me’ (reason: four out of five parents reported that the item was too difficult for their child) and ‘Each day I look forward to having a lot of fun’ (reason: overlap with current item 3).

## References

- 1 Kazdin AE. Evaluation of the Pleasure Scale in the Assessment of Anhedonia in Children. *Journal of the American Academy of Child & Adolescent Psychiatry* 1989;28:364–72. doi:10.1097/00004583-198905000-00010

- 2 Bamford C, Lagattuta KH. Looking on the Bright Side: Children's Knowledge About the Benefits of Positive Versus Negative Thinking. *Child Development* 2012;**83**:667–82. doi:10.1111/j.1467-8624.2011.01706.x
- 3 Ey S, Hadley W, Allen DN, *et al.* A new measure of children's optimism and pessimism: the youth life orientation test. *Journal of Child Psychology and Psychiatry* 2005;**46**:548–58. doi:10.1111/j.1469-7610.2004.00372.x
